# Supplementary material
Source: publisher figshare collection journal article supplement (https://acs.figshare.com/ndownloader/files/4754428)
Supplement: Supplementary file 1 [file 4754428]

## Supporting Information

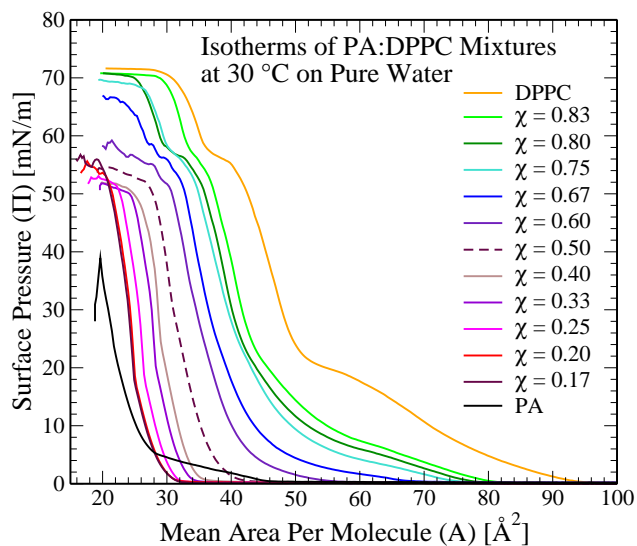

Figure 7: Isotherms for mixtures of PA with DPPC at 30 °C on a water subphase. Unlike in Figure 1, values of  $A$  here are reported per molecule rather than per hydrocarbon tail. These data were used for determining the  $\Pi_c$  vs.  $\chi_{DPPC}$  values in Figure 3. ( $\chi = \chi_{DPPC}$ .)
